# Supplementary material for: The causality between CD8+NKT cells and CD16−CD56 on NK cells with hepatocellular carcinoma: a Mendelian randomization study
Source: Infect Agent Cancer. 2024 Jan 20;19:3. doi: 10.1186/s13027-024-00565-8 (PMC10799464; doi:10.1186/s13027-024-00565-8)
Supplement: Supplementary file 2 — Additional file 2: Exposure and outcome harmonize data. [file 13027_2024_565_MOESM2_ESM.zip]

Archive with 9 entries (9 files):
- Tables/CD16-CD56 on NK-harmonise_data.csv
- Tables/CD45 on HLA DR+ NK-harmonise_data.csv
- Tables/CD45 on NK-harmonise_data.csv
- Tables/CD8NKT-harmonise_data.csv
- Tables/HLA DR NKNK+-harmonise_data.csv
- Tables/HLA DR+NKCD3-lymphocyte-harmonise_data.csv
- Tables/NKCD3-lymphocyte-harmonise_data.csv
- Tables/NK-harmonise_data.csv
- Tables/SSC-A on NK-harmonise_data.csv
