# Supplementary material for: The causality between CD8+NKT cells and CD16−CD56 on NK cells with hepatocellular carcinoma: a Mendelian randomization study
Source: Infect Agent Cancer. 2024 Jan 20;19:3. doi: 10.1186/s13027-024-00565-8 (PMC10799464; doi:10.1186/s13027-024-00565-8)
Supplement: Supplementary file 2 — Additional file 2: Exposure and outcome harmonize data. [file 13027_2024_565_MOESM2_ESM.zip › Tables/CD8NKT-harmonise_data.csv]

	SNP	effect_allele.exposure	other_allele.exposure	effect_allele.outcome	other_allele.outcome	beta.exposure	beta.outcome	eaf.exposure	eaf.outcome	remove	palindromic	ambiguous	id.outcome	chr	pos	se.outcome	samplesize.outcome	pval.outcome	outcome	originalname.outcome	outcome.deprecated	mr_keep.outcome	data_source.outcome	chr.exposure	samplesize.exposure	pos.exposure	se.exposure	pval.exposure	id.exposure	exposure	mr_keep.exposure	pval_origin.exposure	data_source.exposure	action	mr_keep
1	rs12224032	G	C	G	C	0.14	-6.76703e-05	0.2087	0.185764	FALSE	TRUE	FALSE	ieu-b-4953	11	112914680	6.34796e-05	372184	0.29	Liver cell carcinoma || id:ieu-b-4953	Liver cell carcinoma	Liver cell carcinoma || ||	TRUE	igd	11	3668	112914680	0.03055	4.76299e-06	ebi-a-GCST90001632	|| id:ebi-a-GCST90001632	TRUE	reported	igd	2	TRUE
2	rs2041561	C	G	C	G	0.1491	-7.08618e-05	0.8213	0.785296	FALSE	TRUE	FALSE	ieu-b-4953	7	52580478	6.00436e-05	372184	0.24	Liver cell carcinoma || id:ieu-b-4953	Liver cell carcinoma	Liver cell carcinoma || ||	TRUE	igd	7	3668	52580478	0.0321	3.52201e-06	ebi-a-GCST90001632	|| id:ebi-a-GCST90001632	TRUE	reported	igd	2	TRUE
3	rs2074023	T	C	T	C	-0.1242	6.36769e-05	0.4124	0.388331	FALSE	FALSE	FALSE	ieu-b-4953	11	2325581	5.08386e-05	372184	0.21	Liver cell carcinoma || id:ieu-b-4953	Liver cell carcinoma	Liver cell carcinoma || ||	TRUE	igd	11	3668	2325581	0.02469	5.06302e-07	ebi-a-GCST90001632	|| id:ebi-a-GCST90001632	TRUE	reported	igd	2	TRUE
4	rs2395191	C	T	C	T	0.1479	-9.933e-06	0.3721	0.681719	FALSE	FALSE	FALSE	ieu-b-4953	6	32447085	5.30102e-05	372184	0.85	Liver cell carcinoma || id:ieu-b-4953	Liver cell carcinoma	Liver cell carcinoma || ||	TRUE	igd	6	3668	32447085	0.0299	7.86593e-07	ebi-a-GCST90001632	|| id:ebi-a-GCST90001632	TRUE	reported	igd	2	TRUE
5	rs725683	T	C	T	C	-0.1213	2.3131e-05	0.5781	0.523024	FALSE	FALSE	FALSE	ieu-b-4953	10	90258876	4.92713e-05	372184	0.64	Liver cell carcinoma || id:ieu-b-4953	Liver cell carcinoma	Liver cell carcinoma || ||	TRUE	igd	10	3668	90258876	0.02557	2.18399e-06	ebi-a-GCST90001632	|| id:ebi-a-GCST90001632	TRUE	reported	igd	2	TRUE
6	rs75361910	T	C	T	C	-0.1928	7.09289e-05	0.117	0.083313	FALSE	FALSE	FALSE	ieu-b-4953	17	33793208	8.93548e-05	372184	0.43	Liver cell carcinoma || id:ieu-b-4953	Liver cell carcinoma	Liver cell carcinoma || ||	TRUE	igd	17	3668	33793208	0.03853	5.851e-07	ebi-a-GCST90001632	|| id:ebi-a-GCST90001632	TRUE	reported	igd	2	TRUE
