# Supplementary material for: The causality between CD8+NKT cells and CD16−CD56 on NK cells with hepatocellular carcinoma: a Mendelian randomization study
Source: Infect Agent Cancer. 2024 Jan 20;19:3. doi: 10.1186/s13027-024-00565-8 (PMC10799464; doi:10.1186/s13027-024-00565-8)
Supplement: Supplementary file 2 — Additional file 2: Exposure and outcome harmonize data. [file 13027_2024_565_MOESM2_ESM.zip › Tables/CD16-CD56 on NK-harmonise_data.csv]

	SNP	effect_allele.exposure	other_allele.exposure	effect_allele.outcome	other_allele.outcome	beta.exposure	beta.outcome	eaf.exposure	eaf.outcome	remove	palindromic	ambiguous	id.outcome	chr	pos	se.outcome	samplesize.outcome	pval.outcome	outcome	originalname.outcome	outcome.deprecated	mr_keep.outcome	data_source.outcome	se.exposure	samplesize.exposure	pos.exposure	chr.exposure	pval.exposure	id.exposure	exposure	mr_keep.exposure	pval_origin.exposure	data_source.exposure	action	mr_keep
1	rs10919544	C	T	C	T	-0.2555	8.5455e-05	0.5475	0.31805	FALSE	FALSE	FALSE	ieu-b-4953	1	161508763	5.32685e-05	372184	0.11	Liver cell carcinoma || id:ieu-b-4953	Liver cell carcinoma	Liver cell carcinoma || ||	TRUE	igd	0.02745	3113	161508763	1	2.40381e-20	ebi-a-GCST90001884	|| id:ebi-a-GCST90001884	TRUE	reported	igd	2	TRUE
2	rs11214436	T	G	T	G	0.3221	-3.35897e-06	0.3055	0.383346	FALSE	FALSE	FALSE	ieu-b-4953	11	112830782	5.08051e-05	372184	0.95	Liver cell carcinoma || id:ieu-b-4953	Liver cell carcinoma	Liver cell carcinoma || ||	TRUE	igd	0.02878	3113	112830782	11	1.59294e-28	ebi-a-GCST90001884	|| id:ebi-a-GCST90001884	TRUE	reported	igd	2	TRUE
3	rs12644590	G	A	G	A	0.3926	-0.000137859	0.0265	0.125587	FALSE	FALSE	FALSE	ieu-b-4953	4	16657392	7.52629e-05	372184	0.0669993	Liver cell carcinoma || id:ieu-b-4953	Liver cell carcinoma	Liver cell carcinoma || ||	TRUE	igd	0.08376	3113	16657392	4	2.89501e-06	ebi-a-GCST90001884	|| id:ebi-a-GCST90001884	TRUE	reported	igd	2	TRUE
4	rs12944882	C	T	C	T	-0.1336	5.5474e-05	0.4639	0.541401	FALSE	FALSE	FALSE	ieu-b-4953	17	37983492	4.95164e-05	372184	0.26	Liver cell carcinoma || id:ieu-b-4953	Liver cell carcinoma	Liver cell carcinoma || ||	TRUE	igd	0.02747	3113	37983492	17	1.22e-06	ebi-a-GCST90001884	|| id:ebi-a-GCST90001884	TRUE	reported	igd	2	TRUE
5	rs2844642	A	G	A	G	-0.2426	5.26579e-05	0.0996	0.180922	FALSE	FALSE	FALSE	ieu-b-4953	6	31019806	6.39263e-05	372184	0.41	Liver cell carcinoma || id:ieu-b-4953	Liver cell carcinoma	Liver cell carcinoma || ||	TRUE	igd	0.05192	3113	31019806	6	3.09699e-06	ebi-a-GCST90001884	|| id:ebi-a-GCST90001884	TRUE	reported	igd	2	TRUE
6	rs7023353	C	T	C	T	0.1483	-1.09527e-05	0.262	0.325698	FALSE	FALSE	FALSE	ieu-b-4953	9	110692719	5.32833e-05	372184	0.84	Liver cell carcinoma || id:ieu-b-4953	Liver cell carcinoma	Liver cell carcinoma || ||	TRUE	igd	0.0313	3113	110692719	9	2.24202e-06	ebi-a-GCST90001884	|| id:ebi-a-GCST90001884	TRUE	reported	igd	2	TRUE
7	rs7947051	G	A	G	A	0.1847	-0.000107095	0.1505	0.144582	FALSE	FALSE	FALSE	ieu-b-4953	11	129495547	7.04114e-05	372184	0.13	Liver cell carcinoma || id:ieu-b-4953	Liver cell carcinoma	Liver cell carcinoma || ||	TRUE	igd	0.03723	3113	129495547	11	7.42096e-07	ebi-a-GCST90001884	|| id:ebi-a-GCST90001884	TRUE	reported	igd	2	TRUE
