# Supplementary material for: The causality between CD8+NKT cells and CD16−CD56 on NK cells with hepatocellular carcinoma: a Mendelian randomization study
Source: Infect Agent Cancer. 2024 Jan 20;19:3. doi: 10.1186/s13027-024-00565-8 (PMC10799464; doi:10.1186/s13027-024-00565-8)
Supplement: Supplementary file 2 — Additional file 2: Exposure and outcome harmonize data. [file 13027_2024_565_MOESM2_ESM.zip › Tables/CD45 on HLA DR+ NK-harmonise_data.csv]

	SNP	effect_allele.exposure	other_allele.exposure	effect_allele.outcome	other_allele.outcome	beta.exposure	beta.outcome	eaf.exposure	eaf.outcome	remove	palindromic	ambiguous	id.outcome	chr	pos	se.outcome	samplesize.outcome	pval.outcome	outcome	originalname.outcome	outcome.deprecated	mr_keep.outcome	data_source.outcome	pval.exposure	pos.exposure	chr.exposure	samplesize.exposure	se.exposure	id.exposure	exposure	mr_keep.exposure	pval_origin.exposure	data_source.exposure	action	mr_keep
1	rs12772032	T	A	T	A	-0.1338	3.45597e-05	0.3482	0.318927	FALSE	TRUE	FALSE	ieu-b-4953	10	125376027	5.28853e-05	372184	0.51	Liver cell carcinoma || id:ieu-b-4953	Liver cell carcinoma	Liver cell carcinoma || ||	TRUE	igd	3.56796e-06	125376027	10	2971	0.02881	ebi-a-GCST90001912	|| id:ebi-a-GCST90001912	TRUE	reported	igd	2	TRUE
2	rs1860345	C	T	C	T	-0.1714	-3.1791e-05	0.1705	0.281999	FALSE	FALSE	FALSE	ieu-b-4953	12	4910812	5.57832e-05	372184	0.57	Liver cell carcinoma || id:ieu-b-4953	Liver cell carcinoma	Liver cell carcinoma || ||	TRUE	igd	2.071e-06	4910812	12	2971	0.03604	ebi-a-GCST90001912	|| id:ebi-a-GCST90001912	TRUE	reported	igd	2	TRUE
3	rs2495272	G	A	G	A	0.1636	-3.17419e-05	0.8179	0.807765	FALSE	FALSE	FALSE	ieu-b-4953	1	2897465	6.52474e-05	372184	0.630001	Liver cell carcinoma || id:ieu-b-4953	Liver cell carcinoma	Liver cell carcinoma || ||	TRUE	igd	2.26001e-06	2897465	1	2971	0.03453	ebi-a-GCST90001912	|| id:ebi-a-GCST90001912	TRUE	reported	igd	2	TRUE
4	rs7698455	T	A	T	A	0.2256	-3.93572e-05	0.9137	0.879383	FALSE	TRUE	FALSE	ieu-b-4953	4	6690481	7.87268e-05	372184	0.62	Liver cell carcinoma || id:ieu-b-4953	Liver cell carcinoma	Liver cell carcinoma || ||	TRUE	igd	3.41397e-06	6690481	4	2971	0.04849	ebi-a-GCST90001912	|| id:ebi-a-GCST90001912	TRUE	reported	igd	2	TRUE
