# Supplementary material for: The causality between CD8+NKT cells and CD16−CD56 on NK cells with hepatocellular carcinoma: a Mendelian randomization study
Source: Infect Agent Cancer. 2024 Jan 20;19:3. doi: 10.1186/s13027-024-00565-8 (PMC10799464; doi:10.1186/s13027-024-00565-8)
Supplement: Supplementary file 2 — Additional file 2: Exposure and outcome harmonize data. [file 13027_2024_565_MOESM2_ESM.zip › Tables/CD45 on NK-harmonise_data.csv]

	SNP	effect_allele.exposure	other_allele.exposure	effect_allele.outcome	other_allele.outcome	beta.exposure	beta.outcome	eaf.exposure	eaf.outcome	remove	palindromic	ambiguous	id.outcome	chr	pos	se.outcome	samplesize.outcome	pval.outcome	outcome	originalname.outcome	outcome.deprecated	mr_keep.outcome	data_source.outcome	pos.exposure	chr.exposure	samplesize.exposure	se.exposure	pval.exposure	id.exposure	exposure	mr_keep.exposure	pval_origin.exposure	data_source.exposure	action	mr_keep
1	rs10882100	G	C	G	C	0.1317	2.9842e-05	0.4998	0.478046	FALSE	TRUE	TRUE	ieu-b-4953	10	94460687	4.93314e-05	372184	0.55	Liver cell carcinoma || id:ieu-b-4953	Liver cell carcinoma	Liver cell carcinoma || ||	TRUE	igd	94460687	10	3113	0.02741	1.626e-06	ebi-a-GCST90001911	|| id:ebi-a-GCST90001911	TRUE	reported	igd	2	FALSE
2	rs1182654	T	C	T	C	0.1297	3.77377e-06	0.4088	0.510695	FALSE	FALSE	FALSE	ieu-b-4953	9	19731896	5.05977e-05	372184	0.94	Liver cell carcinoma || id:ieu-b-4953	Liver cell carcinoma	Liver cell carcinoma || ||	TRUE	igd	19731896	9	3113	0.02755	2.60801e-06	ebi-a-GCST90001911	|| id:ebi-a-GCST90001911	TRUE	reported	igd	2	TRUE
3	rs12593800	C	T	C	T	-0.1265	-1.67458e-05	0.4162	0.3141	FALSE	FALSE	FALSE	ieu-b-4953	15	79575521	5.29841e-05	372184	0.75	Liver cell carcinoma || id:ieu-b-4953	Liver cell carcinoma	Liver cell carcinoma || ||	TRUE	igd	79575521	15	3113	0.02713	3.22099e-06	ebi-a-GCST90001911	|| id:ebi-a-GCST90001911	TRUE	reported	igd	2	TRUE
4	rs12928699	T	C	T	C	0.2398	-2.61654e-05	0.0765	0.084858	FALSE	FALSE	FALSE	ieu-b-4953	16	5027948	8.83635e-05	372184	0.77	Liver cell carcinoma || id:ieu-b-4953	Liver cell carcinoma	Liver cell carcinoma || ||	TRUE	igd	5027948	16	3113	0.05098	2.67202e-06	ebi-a-GCST90001911	|| id:ebi-a-GCST90001911	TRUE	reported	igd	2	TRUE
5	rs2163548	G	C	G	C	-0.1744	1.52503e-05	0.154	0.144996	FALSE	TRUE	FALSE	ieu-b-4953	2	201226862	6.99984e-05	372184	0.83	Liver cell carcinoma || id:ieu-b-4953	Liver cell carcinoma	Liver cell carcinoma || ||	TRUE	igd	201226862	2	3113	0.03788	4.346e-06	ebi-a-GCST90001911	|| id:ebi-a-GCST90001911	TRUE	reported	igd	2	TRUE
6	rs2377027	G	C	G	C	0.159	6.7032e-06	0.6002	0.522659	FALSE	TRUE	TRUE	ieu-b-4953	1	226420536	4.92916e-05	372184	0.89	Liver cell carcinoma || id:ieu-b-4953	Liver cell carcinoma	Liver cell carcinoma || ||	TRUE	igd	226420536	1	3113	0.02795	1.393e-08	ebi-a-GCST90001911	|| id:ebi-a-GCST90001911	TRUE	reported	igd	2	FALSE
7	rs4327090	G	A	G	A	0.1656	1.00449e-06	0.2345	0.197638	FALSE	FALSE	FALSE	ieu-b-4953	17	43902541	6.24927e-05	372184	0.99	Liver cell carcinoma || id:ieu-b-4953	Liver cell carcinoma	Liver cell carcinoma || ||	TRUE	igd	43902541	17	3113	0.0352	2.63403e-06	ebi-a-GCST90001911	|| id:ebi-a-GCST90001911	TRUE	reported	igd	2	TRUE
8	rs6721978	C	T	C	T	0.2237	-4.16839e-05	0.3466	0.230973	FALSE	FALSE	FALSE	ieu-b-4953	2	232290157	5.84006e-05	372184	0.48	Liver cell carcinoma || id:ieu-b-4953	Liver cell carcinoma	Liver cell carcinoma || ||	TRUE	igd	232290157	2	3113	0.02785	1.34215e-15	ebi-a-GCST90001911	|| id:ebi-a-GCST90001911	TRUE	reported	igd	2	TRUE
9	rs72677702	G	T	G	T	0.1431	-8.86946e-06	0.2739	0.296022	FALSE	FALSE	FALSE	ieu-b-4953	14	40030520	5.52555e-05	372184	0.87	Liver cell carcinoma || id:ieu-b-4953	Liver cell carcinoma	Liver cell carcinoma || ||	TRUE	igd	40030520	14	3113	0.03058	3.02099e-06	ebi-a-GCST90001911	|| id:ebi-a-GCST90001911	TRUE	reported	igd	2	TRUE
10	rs72756114	A	C	A	C	-0.1318	7.43736e-06	0.3155	0.318168	FALSE	FALSE	FALSE	ieu-b-4953	5	54862828	5.3809e-05	372184	0.89	Liver cell carcinoma || id:ieu-b-4953	Liver cell carcinoma	Liver cell carcinoma || ||	TRUE	igd	54862828	5	3113	0.02873	4.68997e-06	ebi-a-GCST90001911	|| id:ebi-a-GCST90001911	TRUE	reported	igd	2	TRUE
11	rs751514	C	T	C	T	-0.1571	5.68136e-05	0.7695	0.826688	FALSE	FALSE	FALSE	ieu-b-4953	10	126366931	6.52196e-05	372184	0.38	Liver cell carcinoma || id:ieu-b-4953	Liver cell carcinoma	Liver cell carcinoma || ||	TRUE	igd	126366931	10	3113	0.03173	7.79902e-07	ebi-a-GCST90001911	|| id:ebi-a-GCST90001911	TRUE	reported	igd	2	TRUE
