# Supplementary material for: The causality between CD8+NKT cells and CD16−CD56 on NK cells with hepatocellular carcinoma: a Mendelian randomization study
Source: Infect Agent Cancer. 2024 Jan 20;19:3. doi: 10.1186/s13027-024-00565-8 (PMC10799464; doi:10.1186/s13027-024-00565-8)
Supplement: Supplementary file 2 — Additional file 2: Exposure and outcome harmonize data. [file 13027_2024_565_MOESM2_ESM.zip › Tables/HLA DR NKNK+-harmonise_data.csv]

	SNP	effect_allele.exposure	other_allele.exposure	effect_allele.outcome	other_allele.outcome	beta.exposure	beta.outcome	eaf.exposure	eaf.outcome	remove	palindromic	ambiguous	id.outcome	chr	pos	se.outcome	samplesize.outcome	pval.outcome	outcome	originalname.outcome	outcome.deprecated	mr_keep.outcome	data_source.outcome	proxy.outcome	target_snp.outcome	proxy_snp.outcome	target_a1.outcome	target_a2.outcome	proxy_a1.outcome	proxy_a2.outcome	pos.exposure	pval.exposure	se.exposure	samplesize.exposure	chr.exposure	id.exposure	exposure	mr_keep.exposure	pval_origin.exposure	data_source.exposure	action	mr_keep
1	rs117338457	T	G	T	G	0.2936	-2.66E-06	0.0449	0.075566	FALSE	FALSE	FALSE	ieu-b-4953	11	69354886	9.75E-05	372184	0.98	Liver cell carcinoma || id:ieu-b-4953	Liver cell carcinoma	Liver cell carcinoma || ||	TRUE	igd	NA	NA	NA	NA	NA	NA	NA	69354886	2.40E-06	0.06216	3596	11	ebi-a-GCST90001649	|| id:ebi-a-GCST90001649	TRUE	reported	igd	2	TRUE
2	rs1862176	A	G	A	G	-0.14	6.28E-05	0.6792	0.699279	FALSE	FALSE	FALSE	ieu-b-4953	5	139800728	5.37E-05	372184	0.24	Liver cell carcinoma || id:ieu-b-4953	Liver cell carcinoma	Liver cell carcinoma || ||	TRUE	igd	NA	NA	NA	NA	NA	NA	NA	139730444	3.87E-07	0.02753	3596	5	ebi-a-GCST90001649	|| id:ebi-a-GCST90001649	TRUE	reported	igd	2	TRUE
3	rs4656984	C	T	C	T	0.1389	5.40E-05	0.6023	0.612341	FALSE	FALSE	FALSE	ieu-b-4953	1	161078909	5.08E-05	372184	0.29	Liver cell carcinoma || id:ieu-b-4953	Liver cell carcinoma	Liver cell carcinoma || ||	TRUE	igd	NA	NA	NA	NA	NA	NA	NA	161078909	1.32E-07	0.02628	3596	1	ebi-a-GCST90001649	|| id:ebi-a-GCST90001649	TRUE	reported	igd	2	TRUE
4	rs6833916	T	G	T	G	0.1416	5.99E-05	0.2045	0.177835	FALSE	FALSE	FALSE	ieu-b-4953	4	24948155	6.48E-05	372184	0.35	Liver cell carcinoma || id:ieu-b-4953	Liver cell carcinoma	Liver cell carcinoma || ||	TRUE	igd	NA	NA	NA	NA	NA	NA	NA	24948155	3.26E-06	0.03037	3596	4	ebi-a-GCST90001649	|| id:ebi-a-GCST90001649	TRUE	reported	igd	2	TRUE
5	rs71632989	G	T	G	T	-0.6848	-6.78E-05	0.2474	0.118785	FALSE	FALSE	FALSE	ieu-b-4953	1	161533055	7.61E-05	372184	0.37	Liver cell carcinoma || id:ieu-b-4953	Liver cell carcinoma	Liver cell carcinoma || ||	TRUE	igd	NA	NA	NA	NA	NA	NA	NA	161533055	1.30E-124	0.02772	3596	1	ebi-a-GCST90001649	|| id:ebi-a-GCST90001649	TRUE	reported	igd	2	TRUE
6	rs7180804	A	G	A	G	-0.2525	4.84E-06	0.2162	0.257011	FALSE	FALSE	FALSE	ieu-b-4953	15	80259074	5.64E-05	372184	0.93	Liver cell carcinoma || id:ieu-b-4953	Liver cell carcinoma	Liver cell carcinoma || ||	TRUE	igd	NA	NA	NA	NA	NA	NA	NA	80259074	8.74E-17	0.03019	3596	15	ebi-a-GCST90001649	|| id:ebi-a-GCST90001649	TRUE	reported	igd	2	TRUE
7	rs72685367	G	C	G	C	0.3669	-4.21E-05	0.0261	0.078327	FALSE	TRUE	FALSE	ieu-b-4953	1	78442686	9.16E-05	372184	0.649999	Liver cell carcinoma || id:ieu-b-4953	Liver cell carcinoma	Liver cell carcinoma || ||	TRUE	igd	NA	NA	NA	NA	NA	NA	NA	78442686	1.43E-06	0.07597	3596	1	ebi-a-GCST90001649	|| id:ebi-a-GCST90001649	TRUE	reported	igd	2	TRUE
8	rs72770017	A	G	A	G	-0.1367	-5.68E-05	0.7729	0.744469	FALSE	FALSE	FALSE	ieu-b-4953	16	10973612	5.65E-05	372184	0.32	Liver cell carcinoma || id:ieu-b-4953	Liver cell carcinoma	Liver cell carcinoma || ||	TRUE	igd	NA	NA	NA	NA	NA	NA	NA	10973612	4.26E-06	0.02968	3596	16	ebi-a-GCST90001649	|| id:ebi-a-GCST90001649	TRUE	reported	igd	2	TRUE
9	rs74341264	A	G	A	G	0.3328	-6.27E-05	0.1218	0.083478	FALSE	FALSE	FALSE	ieu-b-4953	1	161561151	9.86E-05	372184	0.52	Liver cell carcinoma || id:ieu-b-4953	Liver cell carcinoma	Liver cell carcinoma || ||	TRUE	igd	NA	NA	NA	NA	NA	NA	NA	161561151	1.13E-17	0.03867	3596	1	ebi-a-GCST90001649	|| id:ebi-a-GCST90001649	TRUE	reported	igd	2	TRUE
10	rs80171191	T	C	T	C	-0.1619	7.89E-05	0.1623	0.079556	FALSE	FALSE	FALSE	ieu-b-4953	2	69059451	9.09E-05	372184	0.39	Liver cell carcinoma || id:ieu-b-4953	Liver cell carcinoma	Liver cell carcinoma || ||	TRUE	igd	NA	NA	NA	NA	NA	NA	NA	69059451	2.49E-06	0.03433	3596	2	ebi-a-GCST90001649	|| id:ebi-a-GCST90001649	TRUE	reported	igd	2	TRUE
11	rs865239	G	A	G	A	-0.1371	1.32E-05	0.5004	0.523506	FALSE	FALSE	FALSE	ieu-b-4953	1	156896164	4.94E-05	372184	0.79	Liver cell carcinoma || id:ieu-b-4953	Liver cell carcinoma	Liver cell carcinoma || ||	TRUE	igd	NA	NA	NA	NA	NA	NA	NA	156896164	4.97E-08	0.02509	3596	1	ebi-a-GCST90001649	|| id:ebi-a-GCST90001649	TRUE	reported	igd	2	TRUE
12	rs9916257	T	G	T	G	0.1457	-6.90E-05	0.5698	0.442174	FALSE	FALSE	FALSE	ieu-b-4953	17	33797371	4.97E-05	372184	0.16	Liver cell carcinoma || id:ieu-b-4953	Liver cell carcinoma	Liver cell carcinoma || ||	TRUE	igd	NA	NA	NA	NA	NA	NA	NA	33797371	6.72E-09	0.02506	3596	17	ebi-a-GCST90001649	|| id:ebi-a-GCST90001649	TRUE	reported	igd	2	TRUE
