# Supplementary material for: The causality between CD8+NKT cells and CD16−CD56 on NK cells with hepatocellular carcinoma: a Mendelian randomization study
Source: Infect Agent Cancer. 2024 Jan 20;19:3. doi: 10.1186/s13027-024-00565-8 (PMC10799464; doi:10.1186/s13027-024-00565-8)
Supplement: Supplementary file 2 — Additional file 2: Exposure and outcome harmonize data. [file 13027_2024_565_MOESM2_ESM.zip › Tables/HLA DR+NKCD3-lymphocyte-harmonise_data.csv]

	SNP	effect_allele.exposure	other_allele.exposure	effect_allele.outcome	other_allele.outcome	beta.exposure	beta.outcome	eaf.exposure	eaf.outcome	remove	palindromic	ambiguous	id.outcome	chr	pos	se.outcome	samplesize.outcome	pval.outcome	outcome	originalname.outcome	outcome.deprecated	mr_keep.outcome	data_source.outcome	proxy.outcome	target_snp.outcome	proxy_snp.outcome	target_a1.outcome	target_a2.outcome	proxy_a1.outcome	proxy_a2.outcome	samplesize.exposure	chr.exposure	se.exposure	pos.exposure	pval.exposure	id.exposure	exposure	mr_keep.exposure	pval_origin.exposure	data_source.exposure	action	mr_keep
1	rs1609454	G	A	G	A	-0.1188	-1.35E-05	0.3407	0.283615	FALSE	FALSE	FALSE	ieu-b-4953	19	9110431	6.01E-05	372184	0.82	Liver cell carcinoma || id:ieu-b-4953	Liver cell carcinoma	Liver cell carcinoma || ||	TRUE	igd	NA	NA	NA	NA	NA	NA	NA	3596	19	0.02587	9110431	4.50E-06	ebi-a-GCST90001650	|| id:ebi-a-GCST90001650	TRUE	reported	igd	2	TRUE
2	rs1862176	A	G	A	G	-0.1461	6.28E-05	0.6792	0.699279	FALSE	FALSE	FALSE	ieu-b-4953	5	139800728	5.37E-05	372184	0.24	Liver cell carcinoma || id:ieu-b-4953	Liver cell carcinoma	Liver cell carcinoma || ||	TRUE	igd	NA	NA	NA	NA	NA	NA	NA	3596	5	0.02698	139730444	6.50E-08	ebi-a-GCST90001650	|| id:ebi-a-GCST90001650	TRUE	reported	igd	2	TRUE
3	rs2880640	C	T	C	T	-0.1254	-1.07E-05	0.3411	0.390628	FALSE	FALSE	FALSE	ieu-b-4953	1	162879819	5.07E-05	372184	0.83	Liver cell carcinoma || id:ieu-b-4953	Liver cell carcinoma	Liver cell carcinoma || ||	TRUE	igd	NA	NA	NA	NA	NA	NA	NA	3596	1	0.02609	162879819	1.59E-06	ebi-a-GCST90001650	|| id:ebi-a-GCST90001650	TRUE	reported	igd	2	TRUE
4	rs28816203	A	G	A	G	0.1225	-0.000102291	0.4053	0.301626	FALSE	FALSE	FALSE	ieu-b-4953	16	53157625	5.48E-05	372184	0.0619998	Liver cell carcinoma || id:ieu-b-4953	Liver cell carcinoma	Liver cell carcinoma || ||	TRUE	igd	NA	NA	NA	NA	NA	NA	NA	3596	16	0.02549	53157625	1.61E-06	ebi-a-GCST90001650	|| id:ebi-a-GCST90001650	TRUE	reported	igd	2	TRUE
5	rs62028061	C	T	C	T	-0.1225	-3.10E-05	0.6379	0.75839	FALSE	FALSE	FALSE	ieu-b-4953	16	10961519	5.95E-05	372184	0.6	Liver cell carcinoma || id:ieu-b-4953	Liver cell carcinoma	Liver cell carcinoma || ||	TRUE	igd	NA	NA	NA	NA	NA	NA	NA	3596	16	0.0259	10961519	2.35E-06	ebi-a-GCST90001650	|| id:ebi-a-GCST90001650	TRUE	reported	igd	2	TRUE
6	rs71632979	G	A	G	A	-0.7124	-6.94E-05	0.2474	0.118885	FALSE	FALSE	FALSE	ieu-b-4953	1	161526397	7.61E-05	372184	0.36	Liver cell carcinoma || id:ieu-b-4953	Liver cell carcinoma	Liver cell carcinoma || ||	TRUE	igd	NA	NA	NA	NA	NA	NA	NA	3596	1	0.02686	161526397	9.98E-142	ebi-a-GCST90001650	|| id:ebi-a-GCST90001650	TRUE	reported	igd	2	TRUE
7	rs72685367	G	C	G	C	0.3452	-4.21E-05	0.0261	0.078327	FALSE	TRUE	FALSE	ieu-b-4953	1	78442686	9.16E-05	372184	0.649999	Liver cell carcinoma || id:ieu-b-4953	Liver cell carcinoma	Liver cell carcinoma || ||	TRUE	igd	NA	NA	NA	NA	NA	NA	NA	3596	1	0.0745	78442686	3.73E-06	ebi-a-GCST90001650	|| id:ebi-a-GCST90001650	TRUE	reported	igd	2	TRUE
8	rs74341264	A	G	A	G	0.3424	-6.27E-05	0.1218	0.083478	FALSE	FALSE	FALSE	ieu-b-4953	1	161561151	9.86E-05	372184	0.52	Liver cell carcinoma || id:ieu-b-4953	Liver cell carcinoma	Liver cell carcinoma || ||	TRUE	igd	NA	NA	NA	NA	NA	NA	NA	3596	1	0.03788	161561151	2.53E-19	ebi-a-GCST90001650	|| id:ebi-a-GCST90001650	TRUE	reported	igd	2	TRUE
9	rs8025803	T	A	T	A	-0.2729	1.28E-05	0.1783	0.25945	FALSE	TRUE	FALSE	ieu-b-4953	15	80263217	5.61E-05	372184	0.82	Liver cell carcinoma || id:ieu-b-4953	Liver cell carcinoma	Liver cell carcinoma || ||	TRUE	igd	NA	NA	NA	NA	NA	NA	NA	3596	15	0.0334	80260273	4.22E-16	ebi-a-GCST90001650	|| id:ebi-a-GCST90001650	TRUE	reported	igd	2	TRUE
