# Supplementary material for: The causality between CD8+NKT cells and CD16−CD56 on NK cells with hepatocellular carcinoma: a Mendelian randomization study
Source: Infect Agent Cancer. 2024 Jan 20;19:3. doi: 10.1186/s13027-024-00565-8 (PMC10799464; doi:10.1186/s13027-024-00565-8)
Supplement: Supplementary file 2 — Additional file 2: Exposure and outcome harmonize data. [file 13027_2024_565_MOESM2_ESM.zip › Tables/NK-harmonise_data.csv]

	SNP	effect_allele.exposure	other_allele.exposure	effect_allele.outcome	other_allele.outcome	beta.exposure	beta.outcome	eaf.exposure	eaf.outcome	remove	palindromic	ambiguous	id.outcome	chr	pos	se.outcome	samplesize.outcome	pval.outcome	outcome	originalname.outcome	outcome.deprecated	mr_keep.outcome	data_source.outcome	chr.exposure	samplesize.exposure	se.exposure	pos.exposure	pval.exposure	id.exposure	exposure	mr_keep.exposure	pval_origin.exposure	data_source.exposure	action	mr_keep
1	rs1257331	T	C	T	C	0.1177	-4.12084e-05	0.3785	0.311467	FALSE	FALSE	FALSE	ieu-b-4953	14	99784255	5.30904e-05	372184	0.44	Liver cell carcinoma || id:ieu-b-4953	Liver cell carcinoma	Liver cell carcinoma || ||	TRUE	igd	14	3653	0.02464	99784255	1.82898e-06	ebi-a-GCST90001645	|| id:ebi-a-GCST90001645	TRUE	reported	igd	2	TRUE
2	rs184712	T	C	T	C	-0.188	9.05502e-05	0.1046	0.188944	FALSE	FALSE	FALSE	ieu-b-4953	12	58141602	6.29603e-05	372184	0.15	Liver cell carcinoma || id:ieu-b-4953	Liver cell carcinoma	Liver cell carcinoma || ||	TRUE	igd	12	3653	0.03968	58141602	2.227e-06	ebi-a-GCST90001645	|| id:ebi-a-GCST90001645	TRUE	reported	igd	2	TRUE
3	rs34341378	T	A	T	A	0.1561	-2.52887e-05	0.1693	0.222446	FALSE	TRUE	FALSE	ieu-b-4953	13	74994547	5.92454e-05	372184	0.67	Liver cell carcinoma || id:ieu-b-4953	Liver cell carcinoma	Liver cell carcinoma || ||	TRUE	igd	13	3653	0.0322	74994547	1.30401e-06	ebi-a-GCST90001645	|| id:ebi-a-GCST90001645	TRUE	reported	igd	2	TRUE
4	rs3789102	T	C	T	C	0.1119	-1.92917e-05	0.4744	0.486969	FALSE	FALSE	FALSE	ieu-b-4953	2	111724375	4.94325e-05	372184	0.7	Liver cell carcinoma || id:ieu-b-4953	Liver cell carcinoma	Liver cell carcinoma || ||	TRUE	igd	2	3653	0.02443	111724375	4.75905e-06	ebi-a-GCST90001645	|| id:ebi-a-GCST90001645	TRUE	reported	igd	2	TRUE
5	rs55971447	T	C	T	C	-0.1314	-7.08699e-05	0.2368	0.118032	FALSE	FALSE	FALSE	ieu-b-4953	1	161515326	7.60652e-05	372184	0.35	Liver cell carcinoma || id:ieu-b-4953	Liver cell carcinoma	Liver cell carcinoma || ||	TRUE	igd	1	3653	0.02854	161515326	4.29101e-06	ebi-a-GCST90001645	|| id:ebi-a-GCST90001645	TRUE	reported	igd	2	TRUE
6	rs59536859	G	A	G	A	-0.1659	0.000104326	0.1404	0.149222	FALSE	FALSE	FALSE	ieu-b-4953	9	126947962	6.97416e-05	372184	0.13	Liver cell carcinoma || id:ieu-b-4953	Liver cell carcinoma	Liver cell carcinoma || ||	TRUE	igd	9	3653	0.03479	126947962	1.92199e-06	ebi-a-GCST90001645	|| id:ebi-a-GCST90001645	TRUE	reported	igd	2	TRUE
7	rs597808	G	A	G	A	-0.1204	8.48297e-05	0.5363	0.515128	FALSE	FALSE	FALSE	ieu-b-4953	12	111973358	4.93679e-05	372184	0.0860003	Liver cell carcinoma || id:ieu-b-4953	Liver cell carcinoma	Liver cell carcinoma || ||	TRUE	igd	12	3653	0.02575	111973358	3.05e-06	ebi-a-GCST90001645	|| id:ebi-a-GCST90001645	TRUE	reported	igd	2	TRUE
8	rs7216096	A	G	A	G	0.2022	-1.53845e-06	0.1622	0.170336	FALSE	FALSE	FALSE	ieu-b-4953	17	33772954	6.55209e-05	372184	0.98	Liver cell carcinoma || id:ieu-b-4953	Liver cell carcinoma	Liver cell carcinoma || ||	TRUE	igd	17	3653	0.03265	33772954	6.55104e-10	ebi-a-GCST90001645	|| id:ebi-a-GCST90001645	TRUE	reported	igd	2	TRUE
9	rs935320	T	A	T	A	-0.2003	-0.000117439	0.0829	0.079355	FALSE	TRUE	FALSE	ieu-b-4953	15	57644442	9.14479e-05	372184	0.2	Liver cell carcinoma || id:ieu-b-4953	Liver cell carcinoma	Liver cell carcinoma || ||	TRUE	igd	15	3653	0.04335	57644442	3.96004e-06	ebi-a-GCST90001645	|| id:ebi-a-GCST90001645	TRUE	reported	igd	2	TRUE
10	rs9916257	T	G	T	G	-0.2005	-6.90113e-05	0.5686	0.442174	FALSE	FALSE	FALSE	ieu-b-4953	17	33797371	4.96562e-05	372184	0.16	Liver cell carcinoma || id:ieu-b-4953	Liver cell carcinoma	Liver cell carcinoma || ||	TRUE	igd	17	3653	0.02398	33797371	8.82064e-17	ebi-a-GCST90001645	|| id:ebi-a-GCST90001645	TRUE	reported	igd	2	TRUE
