# Supplementary material for: The causality between CD8+NKT cells and CD16−CD56 on NK cells with hepatocellular carcinoma: a Mendelian randomization study
Source: Infect Agent Cancer. 2024 Jan 20;19:3. doi: 10.1186/s13027-024-00565-8 (PMC10799464; doi:10.1186/s13027-024-00565-8)
Supplement: Supplementary file 2 — Additional file 2: Exposure and outcome harmonize data. [file 13027_2024_565_MOESM2_ESM.zip › Tables/NKCD3-lymphocyte-harmonise_data.csv]

	SNP	effect_allele.exposure	other_allele.exposure	effect_allele.outcome	other_allele.outcome	beta.exposure	beta.outcome	eaf.exposure	eaf.outcome	remove	palindromic	ambiguous	id.outcome	chr	pos	se.outcome	samplesize.outcome	pval.outcome	outcome	originalname.outcome	outcome.deprecated	mr_keep.outcome	data_source.outcome	pos.exposure	chr.exposure	samplesize.exposure	se.exposure	pval.exposure	id.exposure	exposure	mr_keep.exposure	pval_origin.exposure	data_source.exposure	action	mr_keep
1	rs12087279	T	C	T	C	-0.1667	-9.02E-06	0.131	0.156969	FALSE	FALSE	FALSE	ieu-b-4953	1	82243292	6.84E-05	372184	0.9	Liver cell carcinoma || id:ieu-b-4953	Liver cell carcinoma	Liver cell carcinoma || ||	TRUE	igd	82243292	1	3669	0.03634	4.64E-06	ebi-a-GCST90001646	|| id:ebi-a-GCST90001646	TRUE	reported	igd	2	TRUE
2	rs17823772	T	C	T	C	-0.2182	2.41E-05	0.0769	0.123606	FALSE	FALSE	FALSE	ieu-b-4953	10	105928767	7.66E-05	372184	0.75	Liver cell carcinoma || id:ieu-b-4953	Liver cell carcinoma	Liver cell carcinoma || ||	TRUE	igd	105928767	10	3669	0.04488	1.21E-06	ebi-a-GCST90001646	|| id:ebi-a-GCST90001646	TRUE	reported	igd	2	TRUE
3	rs281407	A	G	A	G	0.1175	1.72E-05	0.3684	0.314691	FALSE	FALSE	FALSE	ieu-b-4953	19	49233335	5.31E-05	372184	0.75	Liver cell carcinoma || id:ieu-b-4953	Liver cell carcinoma	Liver cell carcinoma || ||	TRUE	igd	49233335	19	3669	0.02521	3.24E-06	ebi-a-GCST90001646	|| id:ebi-a-GCST90001646	TRUE	reported	igd	2	TRUE
4	rs55971447	T	C	T	C	-0.1488	-7.09E-05	0.237	0.118032	FALSE	FALSE	FALSE	ieu-b-4953	1	161515326	7.61E-05	372184	0.35	Liver cell carcinoma || id:ieu-b-4953	Liver cell carcinoma	Liver cell carcinoma || ||	TRUE	igd	161515326	1	3669	0.02845	1.77E-07	ebi-a-GCST90001646	|| id:ebi-a-GCST90001646	TRUE	reported	igd	2	TRUE
5	rs7218011	G	A	G	A	0.1822	-3.39E-06	0.1634	0.170978	FALSE	FALSE	FALSE	ieu-b-4953	17	33773022	6.54E-05	372184	0.96	Liver cell carcinoma || id:ieu-b-4953	Liver cell carcinoma	Liver cell carcinoma || ||	TRUE	igd	33773022	17	3669	0.03225	1.74E-08	ebi-a-GCST90001646	|| id:ebi-a-GCST90001646	TRUE	reported	igd	2	TRUE
6	rs73174907	A	T	A	T	-0.1949	-2.49E-05	0.1066	0.192778	FALSE	TRUE	FALSE	ieu-b-4953	22	43064030	6.25E-05	372184	0.69	Liver cell carcinoma || id:ieu-b-4953	Liver cell carcinoma	Liver cell carcinoma || ||	TRUE	igd	43064030	22	3669	0.03808	3.23E-07	ebi-a-GCST90001646	|| id:ebi-a-GCST90001646	TRUE	reported	igd	2	TRUE
7	rs73520180	C	T	C	T	-0.3941	9.10E-05	0.0217	0.077676	FALSE	FALSE	FALSE	ieu-b-4953	9	118756021	9.21E-05	372184	0.32	Liver cell carcinoma || id:ieu-b-4953	Liver cell carcinoma	Liver cell carcinoma || ||	TRUE	igd	118756021	9	3669	0.08347	2.44E-06	ebi-a-GCST90001646	|| id:ebi-a-GCST90001646	TRUE	reported	igd	2	TRUE
8	rs9916257	T	G	T	G	-0.1909	-6.90E-05	0.5685	0.442174	FALSE	FALSE	FALSE	ieu-b-4953	17	33797371	4.97E-05	372184	0.16	Liver cell carcinoma || id:ieu-b-4953	Liver cell carcinoma	Liver cell carcinoma || ||	TRUE	igd	33797371	17	3669	0.02375	1.21E-15	ebi-a-GCST90001646	|| id:ebi-a-GCST90001646	TRUE	reported	igd	2	TRUE
