# Supplementary material for: The causality between CD8+NKT cells and CD16−CD56 on NK cells with hepatocellular carcinoma: a Mendelian randomization study
Source: Infect Agent Cancer. 2024 Jan 20;19:3. doi: 10.1186/s13027-024-00565-8 (PMC10799464; doi:10.1186/s13027-024-00565-8)
Supplement: Supplementary file 2 — Additional file 2: Exposure and outcome harmonize data. [file 13027_2024_565_MOESM2_ESM.zip › Tables/SSC-A on NK-harmonise_data.csv]

	SNP	effect_allele.exposure	other_allele.exposure	effect_allele.outcome	other_allele.outcome	beta.exposure	beta.outcome	eaf.exposure	eaf.outcome	remove	palindromic	ambiguous	id.outcome	chr	pos	se.outcome	samplesize.outcome	pval.outcome	outcome	originalname.outcome	outcome.deprecated	mr_keep.outcome	data_source.outcome	chr.exposure	pval.exposure	se.exposure	pos.exposure	samplesize.exposure	id.exposure	exposure	mr_keep.exposure	pval_origin.exposure	data_source.exposure	action	mr_keep
1	rs1006368	T	C	T	C	0.4144	-7.14593e-05	0.1224	0.110592	FALSE	FALSE	FALSE	ieu-b-4953	10	126346603	7.85577e-05	372184	0.36	Liver cell carcinoma || id:ieu-b-4953	Liver cell carcinoma	Liver cell carcinoma || ||	TRUE	igd	10	3.61327e-24	0.04052	126346603	3113	ebi-a-GCST90002076	|| id:ebi-a-GCST90002076	TRUE	reported	igd	2	TRUE
2	rs10512469	T	C	T	C	-0.1684	4.53825e-06	0.1646	0.172781	FALSE	FALSE	FALSE	ieu-b-4953	17	33770802	6.51598e-05	372184	0.94	Liver cell carcinoma || id:ieu-b-4953	Liver cell carcinoma	Liver cell carcinoma || ||	TRUE	igd	17	4.30695e-06	0.03658	33770802	3113	ebi-a-GCST90002076	|| id:ebi-a-GCST90002076	TRUE	reported	igd	2	TRUE
3	rs11703193	A	G	A	G	-0.1793	-8.69785e-05	0.1597	0.191329	FALSE	FALSE	FALSE	ieu-b-4953	22	18542023	6.65622e-05	372184	0.19	Liver cell carcinoma || id:ieu-b-4953	Liver cell carcinoma	Liver cell carcinoma || ||	TRUE	igd	22	1.56801e-06	0.03727	18542023	3113	ebi-a-GCST90002076	|| id:ebi-a-GCST90002076	TRUE	reported	igd	2	TRUE
4	rs28691703	C	T	C	T	0.1706	2.19898e-05	0.2127	0.265667	FALSE	FALSE	FALSE	ieu-b-4953	19	43649306	5.52943e-05	372184	0.69	Liver cell carcinoma || id:ieu-b-4953	Liver cell carcinoma	Liver cell carcinoma || ||	TRUE	igd	19	2.87098e-06	0.03639	43649306	3113	ebi-a-GCST90002076	|| id:ebi-a-GCST90002076	TRUE	reported	igd	2	TRUE
5	rs6850820	A	G	A	G	-0.1642	-6.59812e-05	0.8275	0.76068	FALSE	FALSE	FALSE	ieu-b-4953	4	149325342	5.79733e-05	372184	0.26	Liver cell carcinoma || id:ieu-b-4953	Liver cell carcinoma	Liver cell carcinoma || ||	TRUE	igd	4	4.48198e-06	0.03573	149325342	3113	ebi-a-GCST90002076	|| id:ebi-a-GCST90002076	TRUE	reported	igd	2	TRUE
6	rs6863338	T	C	T	C	0.2553	8.47717e-05	0.084	0.113873	FALSE	FALSE	FALSE	ieu-b-4953	5	127586596	7.79538e-05	372184	0.28	Liver cell carcinoma || id:ieu-b-4953	Liver cell carcinoma	Liver cell carcinoma || ||	TRUE	igd	5	3.84804e-07	0.05018	127586596	3113	ebi-a-GCST90002076	|| id:ebi-a-GCST90002076	TRUE	reported	igd	2	TRUE
7	rs7575742	G	A	G	A	0.1383	1.86766e-05	0.3696	0.668317	FALSE	FALSE	FALSE	ieu-b-4953	2	135429002	5.22852e-05	372184	0.719999	Liver cell carcinoma || id:ieu-b-4953	Liver cell carcinoma	Liver cell carcinoma || ||	TRUE	igd	2	7.57199e-07	0.02791	135429002	3113	ebi-a-GCST90002076	|| id:ebi-a-GCST90002076	TRUE	reported	igd	2	TRUE
8	rs767896	T	C	T	C	0.1637	-5.48018e-05	0.2114	0.303128	FALSE	FALSE	FALSE	ieu-b-4953	6	33791515	5.35336e-05	372184	0.31	Liver cell carcinoma || id:ieu-b-4953	Liver cell carcinoma	Liver cell carcinoma || ||	TRUE	igd	6	1.305e-06	0.03376	33791515	3113	ebi-a-GCST90002076	|| id:ebi-a-GCST90002076	TRUE	reported	igd	2	TRUE
9	rs9912354	T	C	T	C	0.1471	-6.75526e-05	0.5254	0.420299	FALSE	FALSE	FALSE	ieu-b-4953	17	33805730	4.98623e-05	372184	0.18	Liver cell carcinoma || id:ieu-b-4953	Liver cell carcinoma	Liver cell carcinoma || ||	TRUE	igd	17	6.80205e-08	0.02719	33805730	3113	ebi-a-GCST90002076	|| id:ebi-a-GCST90002076	TRUE	reported	igd	2	TRUE
